# Supplementary material for: CircHIPK3 regulates fatty acid metabolism through miR-637/FASN axis to promote esophageal squamous cell carcinoma
Source: Research Square preprint supplement (doi:10.21203/rs.3.rs-3339246/v1), 2023-10-04
Supplement: Supplementary file 1 [file 5fc66990509a0a1888bf9d47.docx]

| **Table S2.** The expression of genes positively-regulated by circHIPK3 in ESCC compared to normal tissue samples. | | |
| --- | --- | --- |
| Gene name | Up- or Down-regulated in ESCC | Significant (P < 0.05), Yes or No |
| **FASN** | **Up** | **Yes** |
| KIF5B | Up | No |
| RAPGEF5 | Up | Yes |
| PEX19 | Up | No |
| ACACA | Up | Yes |
| SLC7A5 | Up | No |
| SCD | Up | Yes |
| GPD1L | Down | Yes |
| MAPK9 | Up | No |
