# Supplementary material for: CircHIPK3 regulates fatty acid metabolism through miR-637/FASN axis to promote esophageal squamous cell carcinoma
Source: Research Square preprint supplement (doi:10.21203/rs.3.rs-3339246/v1), 2023-10-04
Supplement: Supplementary file 2 [file a85cfe1110ec01322ae15668.docx]

| **Table S1.** RT-qPCR Primers, shRNA targeting sequence, and siRNA targeting sequence used in this study | | | |
| --- | --- | --- | --- |
| **RT-qPCR primers** | | |  |
| circHIPK3 | Forward primer | TCGGCCAGTCATGTATCAAA |  |
| Reverse primer | CCCTTAGTGGGAGGATGAGA |  |
| GAPDH | Forward primer | CAATGACCCCTTCATTGACC |  |
| Reverse primer | TTGATTTTGGAGGGATCTCG |  |
| MALAT1 | Forward primer | TGCTGTGTGCCAATGTTTCG |  |
| Reverse primer | AATCCCCTAGGGAAGGGGTC |  |
| FASN | Forward primer | CCCCTGATGAAGAAGGATCA |  |
| Reverse primer | ACTCCACAGGTGGGAACAAG |  |
| U6 | Forward primer | 5ʹ-CGCTTCGGCAGCACATATAC-3ʹ |  |
| Reverse primer | 5ʹ-AAAATATGGAACGCTTCACGA-3ʹ |  |
| ACTIN | Forward primer | CTCTTCCAGCCTTCCTTCCT |  |
| Reverse primer | AGCACTGTGTTGGCGTACAG |  |
|  |  |  |  |
| **shRNA targeting sequence** | | |  |  |  |
| sh circHIPK3 | Forward primer | 5’-CCGGGGTACTACAGGTATGGCCTCACTCGAGTGAGGCCATACCTGTAGTACCTTTTTG-3’ |  |
| Reverse primer | 5’-AATTCAAAAAGGTACTACAGGTATGGCCTCACTCGAGTGAGGCCATACCTGTAGTACC-3’ |  |
|  |  |  |  |
| **siRNA targeting sequence** | | |  |
| si circHIPK3 #1 | GGTACTACAGGTATGGCCT | |  |
| si circHIPK3 #2 | GGTACTACAGGTATGGCCTC | |  |  |
| si FASN #1 | GCATCAATGTCCTGCTGAA | |  |
| si FASN #2 | GCGTTGACCTGGTCTTGAA | |  |
|  |  |  |  |
| **ASO targeting sequence** | | |  |
| ASO circHIPK3 | GGTACTACAGGTATGGCCTC | |  |
|  |  |  |  |
| **FISH probe targeting sequence** | | |  |
| FISH-circHIPK3 | 5'-GACTTGTGAGGCCATACCTGTAGTACCGAGATTG-3' | |  |
